# Supplementary material for: Activating mutations of the tyrosine kinase receptor FGFR3 are associated with benign skin tumors in mice and humans
Source: Oxford University Press journal article supplement (doi:10.1093/hmg/ddi127), 2005-03-16
Supplement: ddi127_Supplementary_Data.zip [file ddi127_Supplementary_Data.zip]

Archive with 1 entries (1 files):
- SUPPLEMENTARY_MATERIALS.pdf
